# Supplementary material for: Amphiphilic phospholipid–iodinated polymer conjugates for bioimaging
Source: Royal Society of Chemistry journal article supplement (doi:10.1039/d0bm02098b), 2021-01-01
Supplement: d0bm02098b1.pdf [file d0bm02098b1.pdf]

## Supplementary Data

### Supplementary Experimental

*In Vitro Cell Viability Tests.* HEK and 3T3 cells were plated for calibration and for cytotoxicity which were seeded and incubated in 96-well plates. For calibration, luminescence was measured for 0 (culture media only), 600, 1,250, 2,500, 5,000, 10,000, and 20,000 cells. For cytotoxicity, 2,000 HEK and 5,000 3T3 cells were seeded for each phospholipid-iodinated polymer conjugate concentration. For calibration and cytotoxicity measurements, cells and CellTiter-Glo 2.0 were brought to room temperature for 30 minutes at the end of the test period and 100  $\mu$ L of CellTiter were added to each well. Each plate was placed on a rotator for at least 2 minutes to mix CellTiter and incubated cell solutions to lyse cells. 100  $\mu$ L of each lysed cell solution were pipetted to a new opaque white plate, followed by luminescence reading in a BioTek Synergy HTX Plate Reader. For calibration, the average luminescence was plotted vs. cell number and fitted with a linear equation (Fig. S6). This linear equation was used to convert the luminescence to cell number for the cytotoxicity measurements.

*Stability Test in Serum.* Human serum (MilliporeSigma) was diluted to 50 times by 1  $\times$  phosphate buffer saline (pH 7.4). 10  $\mu$ L samples (100% conjugate concentration) were dissolved into the diluted human serum and their UV-Vis absorbance was monitored by UV-Vis spectrophotometer (Agilent Cary 6000i) on a daily basis. The particle size of the samples was measured at different time points such as 0 hour, 24 hours, and 48 hours interval using a zeta potentiometer (Malvern Zetasizer ZEN3600).

### Supplementary Figures

**Fig. S1** (A)  $^1\text{H}$  NMR spectrum and (B)  $^{13}\text{C}$  NMR spectrum of iodinated monomer 2,2-bis(iodomethyl)-1,3-propanediol. Acetone- $d_6$  was used as the solvent.

**Fig. S2** (A)  $^1\text{H}$  NMR spectrum and (B)  $^{13}\text{C}$  NMR spectrum of iodinated polymer poly(2,2-bis(iodomethyl)-1,3-propylene sebacate).  $\text{CDCl}_3$  was used as the solvent.

**Fig. S3** Picture of iodinated polymer coupled with azido group precipitation and two layers formation.

**Fig. S4** EDX spectra of iodinated monomer 2,2-bis(iodomethyl)-1,3-propanediol.

**Fig. S5** X-ray density of iodinated polymers in comparison with water and Omnipaque 300.

**Fig. S6** Luminescence to cell number linear calibrations for (A) HEK and (B) 3T3 cells.

**Fig. S7** TEM images of vesicles from self-assemblies of amphiphilic phospholipid-iodinated polymer conjugates with (A) 1:1 and (B) 1:5 coupling ratio of polymers to phospholipids.

**Fig. S8** Stability measurements of amphiphilic phospholipid-iodinated polymer conjugates in serum: (A) UV-Vis measurement and (B) particle size measurement by dynamic light scattering with size distribution report by intensity after 48-hr incubation.

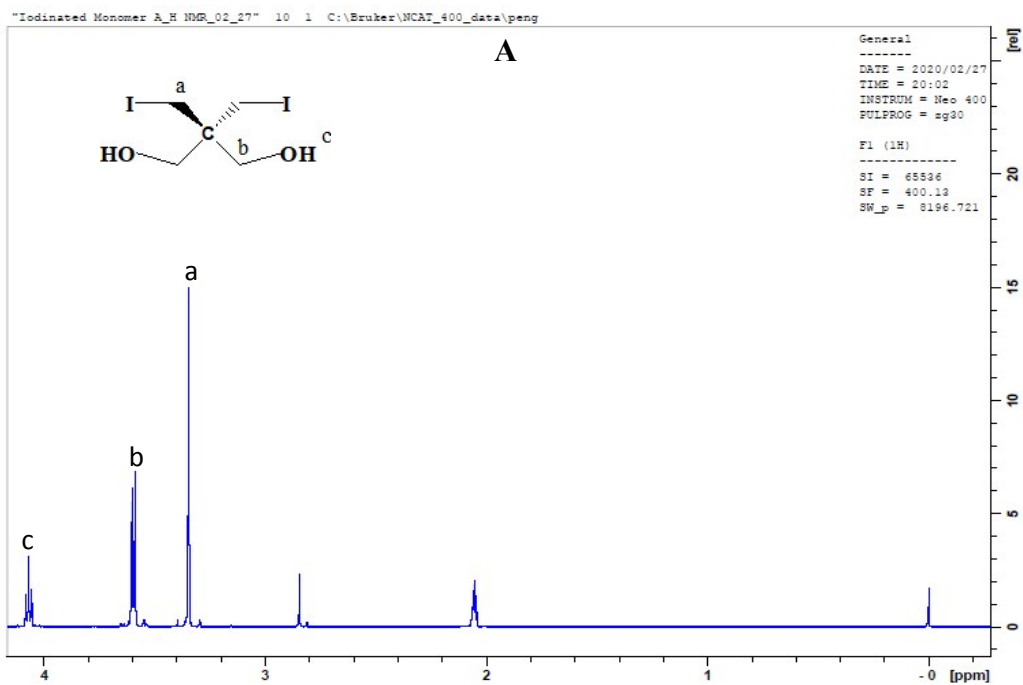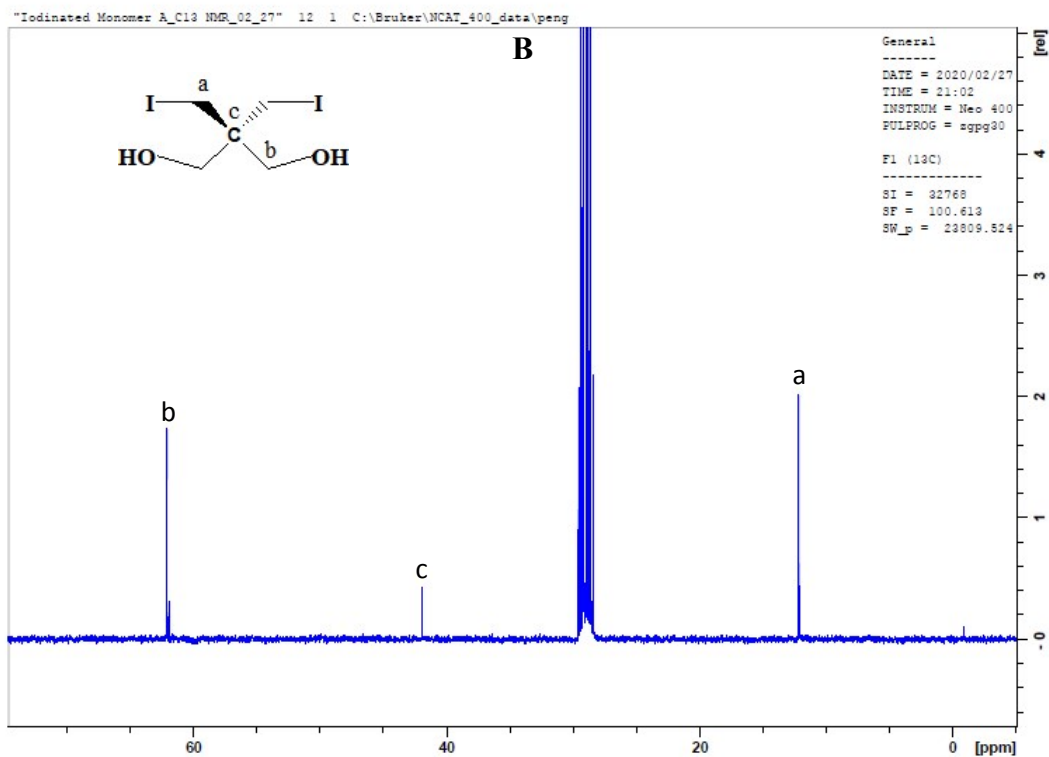

Figure S1

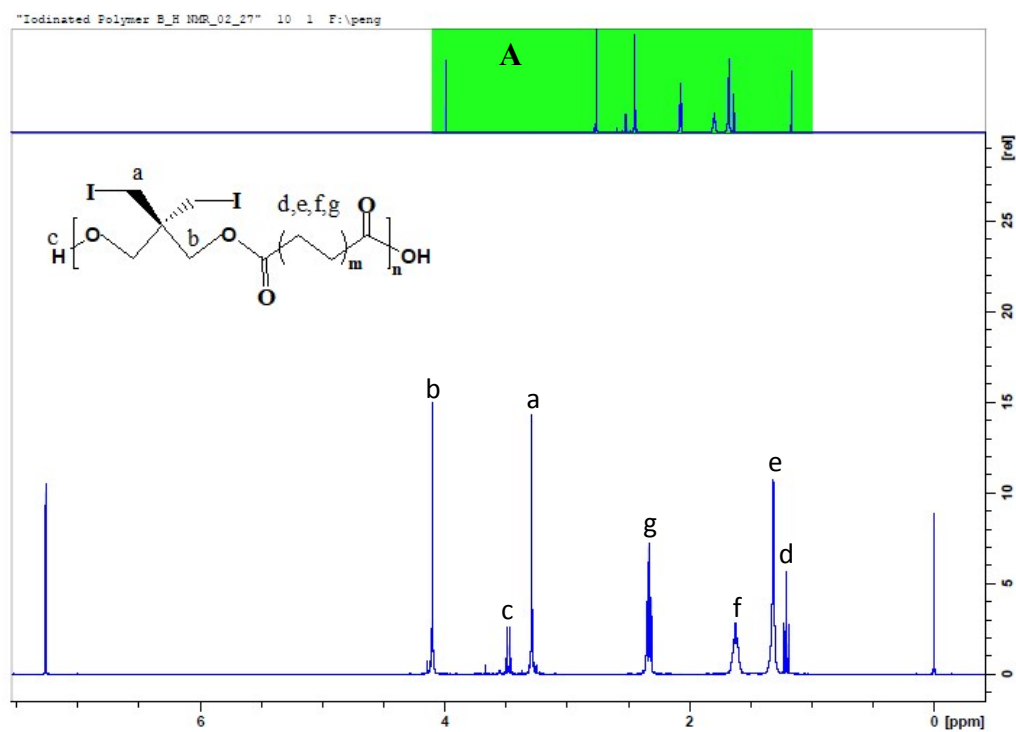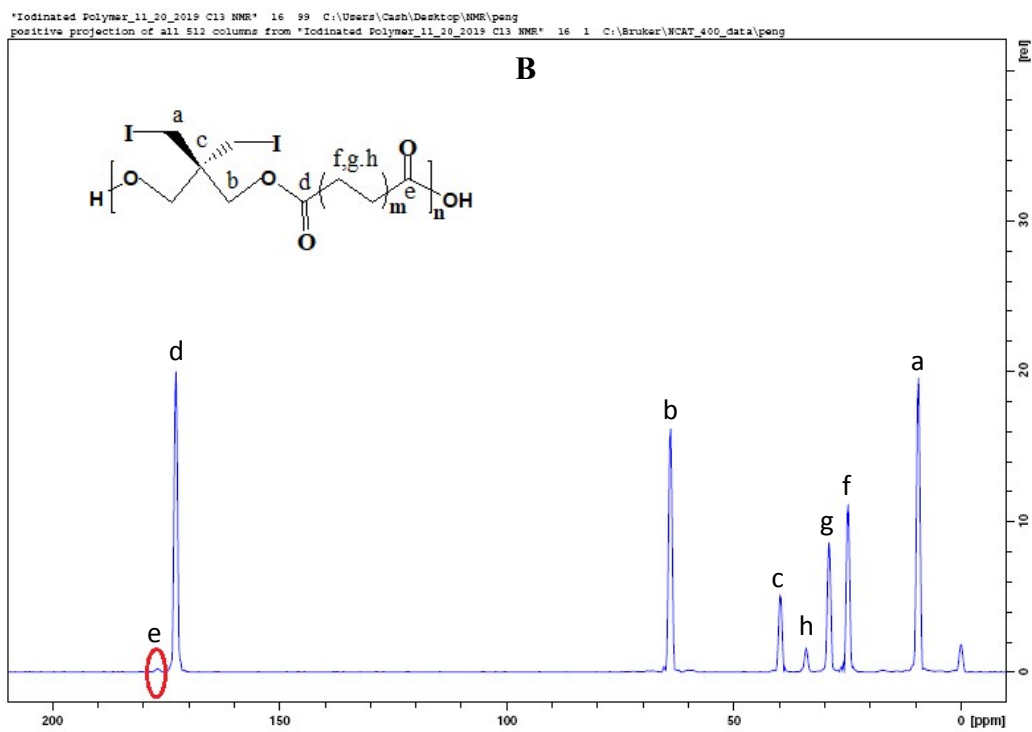

Figure S2

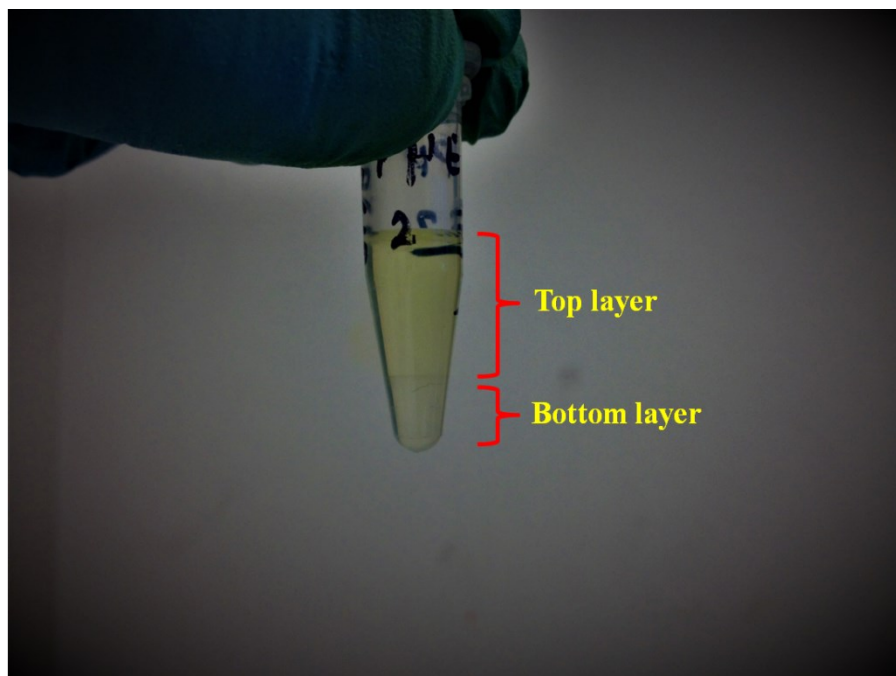

**Figure S3**

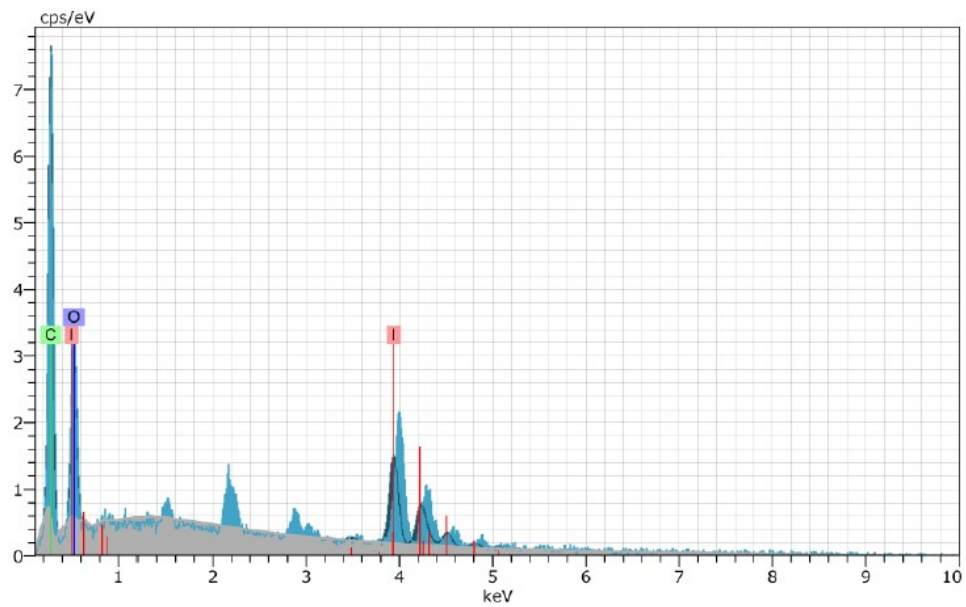

| Element | Series   | unn. C<br>[wt.%] | norm. C<br>[wt.%] | Atom. C<br>[at.%] | Error (1 Sigma)<br>[wt.%] |
|---------|----------|------------------|-------------------|-------------------|---------------------------|
| Iodine  | L-series | 32.05            | 70.25             | 19.56             | 1.32                      |
| Carbon  | K-series | 9.19             | 20.14             | 59.23             | 1.47                      |
| Oxygen  | K-series | 4.38             | 9.61              | 21.21             | 0.83                      |
| Total:  |          | 45.62            | 100.00            | 100.00            |                           |

**Figure S4**

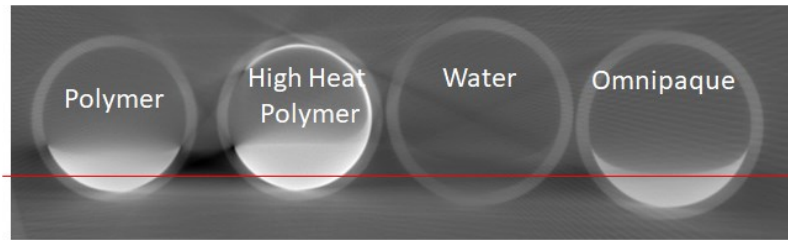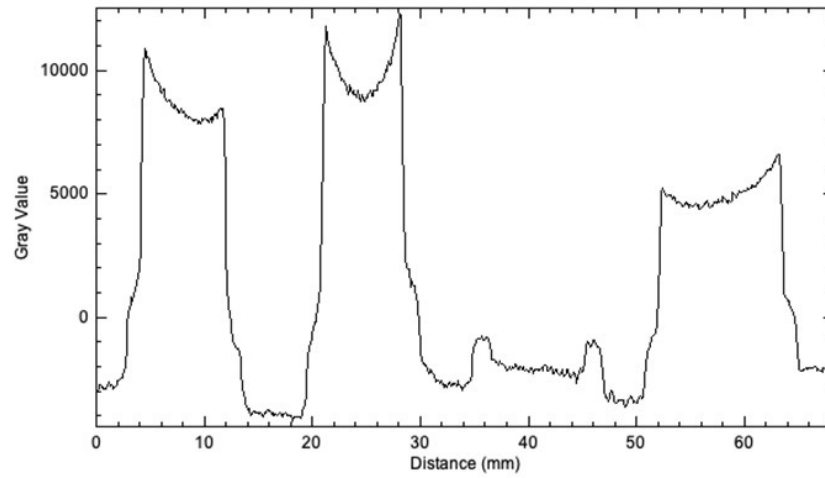

**Figure S5**

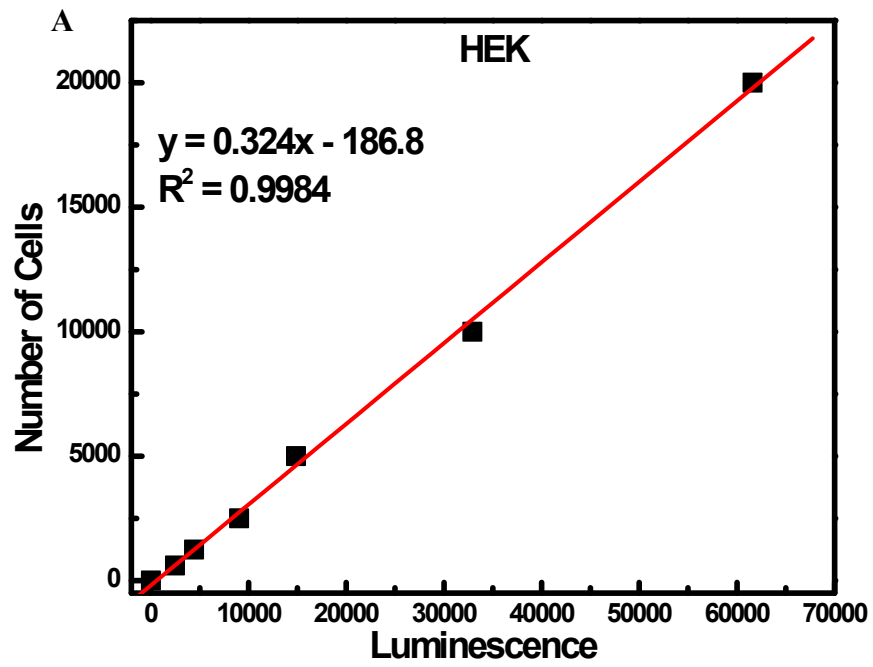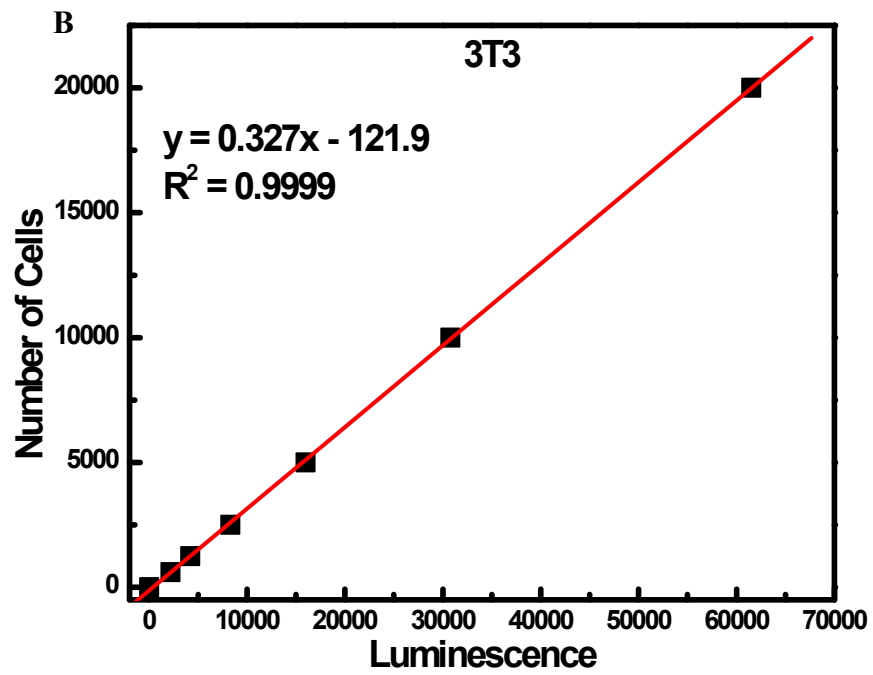

Figure S6

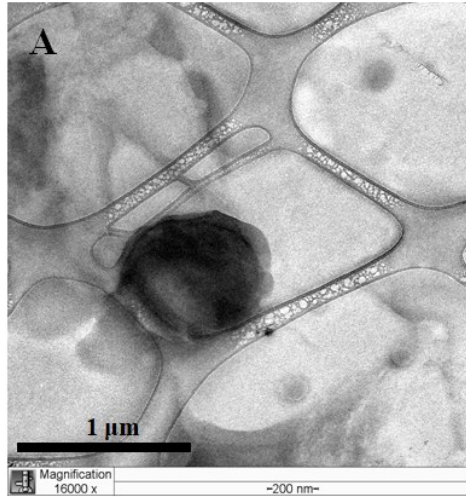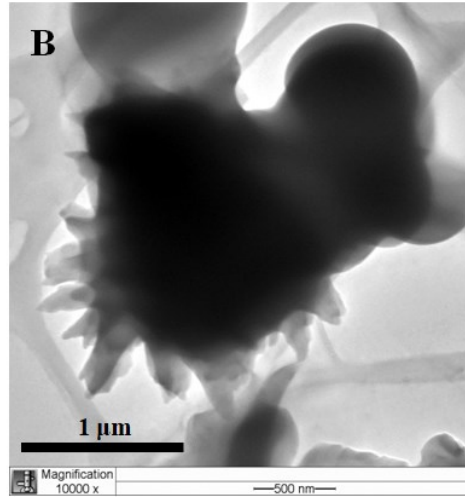

**Figure S7**



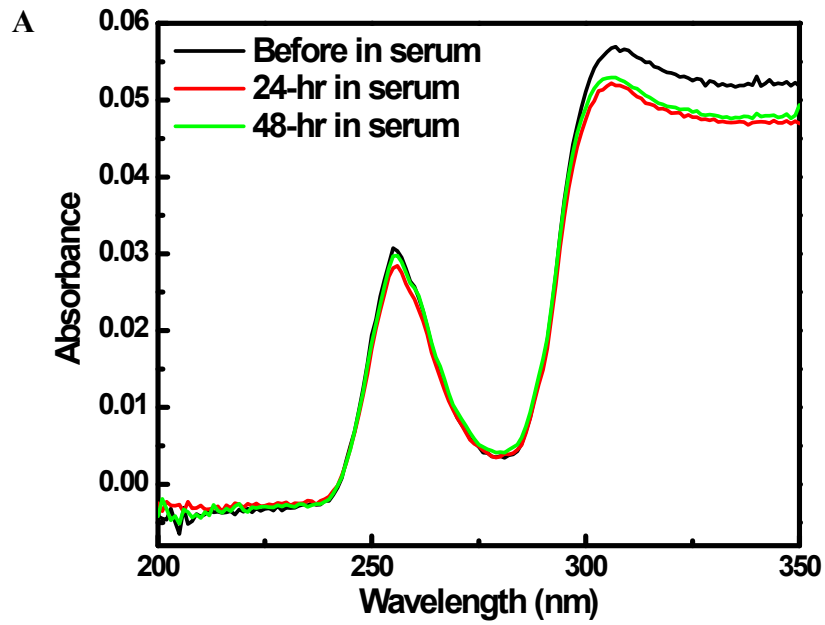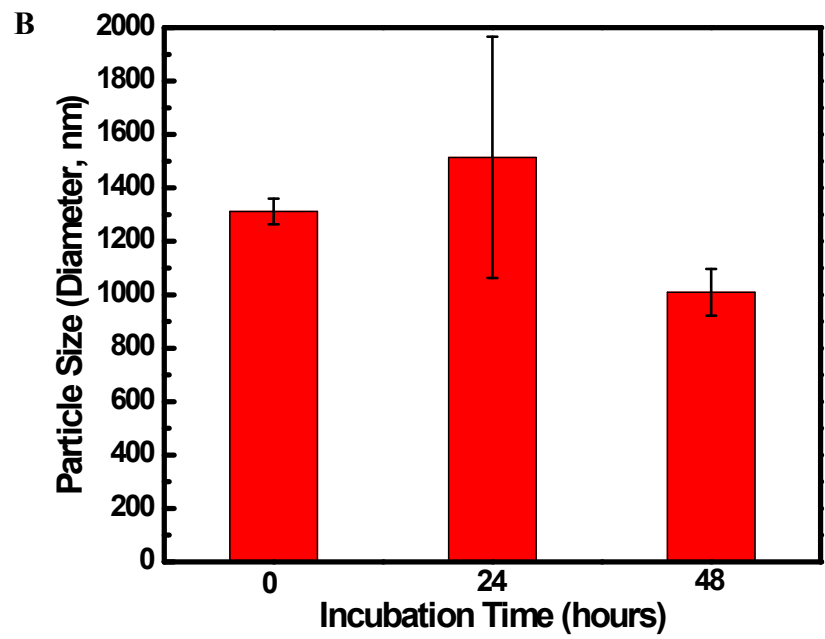

Size Distribution by Intensity

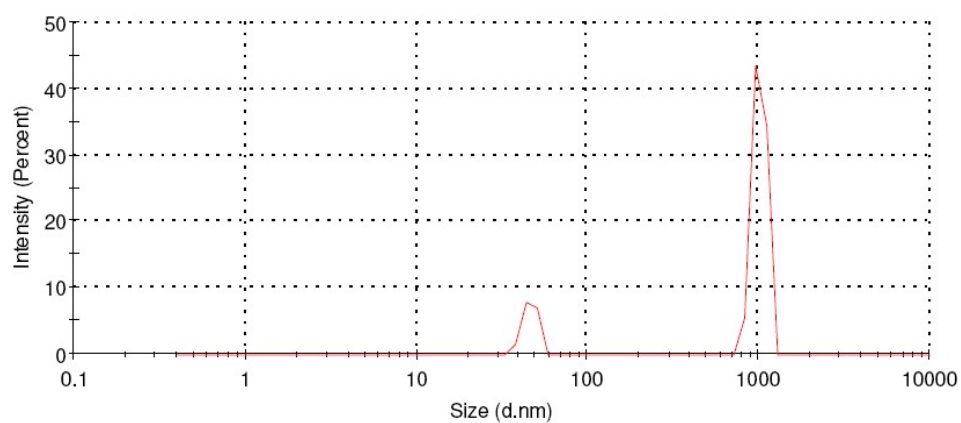

|               | Size (diameter, nm) | % Intensity | Standard Deviation (diameter, nm) |
|---------------|---------------------|-------------|-----------------------------------|
| <b>Peak 1</b> | 1,009               | 83.4        | 87.56                             |
| <b>Peak 2</b> | 46.20               | 16.6        | 4.271                             |

Figure S8
